CORRECTION

# Correction: Leading causes of cardiovascular hospitalization in 8.45 million US veterans

Nirupama Krishnamurthi, Joseph Francis, Stephan D. Fihn, Craig S. Meyer, Mary A. Whooley

There is an error in [Table 1](#). The values in the “All” column are incorrect. The correct [Table 1](#) can be found below.

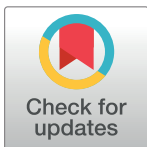

---

 OPEN ACCESS

**Citation:** Krishnamurthi N, Francis J, Fihn SD, Meyer CS, Whooley MA (2018) Correction: Leading causes of cardiovascular hospitalization in 8.45 million US veterans. PLoS ONE 13(7): e0200327. <https://doi.org/10.1371/journal.pone.0200327>

**Published:** July 3, 2018

**Copyright:** © 2018 Krishnamurthi et al. This is an open access article distributed under the terms of the [Creative Commons Attribution License](#), which permits unrestricted use, distribution, and reproduction in any medium, provided the original author and source are credited.

**Table 1. Characteristics of veterans hospitalized vs. not hospitalized for one or more of the top 5 cardiovascular conditions between 2010 and 2014 \*†.**

| Patient Characteristics |                                           | All           |      | Hospitalized  |      | Not Hospitalized |      |
|-------------------------|-------------------------------------------|---------------|------|---------------|------|------------------|------|
|                         |                                           | N = 8,452,912 |      | N = 297,373   |      | N = 8,155,539    |      |
| Age, years (mean ± SD)  |                                           | 60.01 ± 17.63 |      | 68.24 ± 11.18 |      | 59.71 ± 17.75    |      |
| Sex                     | Female, number (%)                        | 579,623       | 6.9  | 7,045         | 2.4  | 572,578          | 7.0  |
|                         | Male                                      | 7,873,289     | 93.1 | 290,328       | 97.6 | 7,582,961        | 93.0 |
| Race                    | White                                     | 5,848,351     | 69.2 | 223,778       | 75.3 | 5,624,573        | 69.0 |
|                         | Black or African American                 | 1,203,447     | 14.2 | 47,910        | 16.1 | 1,155,537        | 14.2 |
|                         | Native Hawaiian or Other Pacific Islander | 61,293        | 0.7  | 2,108         | 0.7  | 59,185           | 0.7  |
|                         | American Indian or Alaska Native          | 55,191        | 0.7  | 1,849         | 0.6  | 53,342           | 0.7  |
|                         | Asian                                     | 75,325        | 0.9  | 1,330         | 0.5  | 73,995           | 0.9  |
| Ethnicity               | Not Hispanic                              | 7,131,212     | 84.4 | 270,873       | 91.1 | 6,860,339        | 84.1 |
|                         | Hispanic                                  | 452,100       | 5.3  | 14,751        | 5.0  | 437,349          | 5.4  |
| Region                  | Southeast                                 | 1,646,007     | 19.5 | 61,067        | 20.5 | 1,584,940        | 19.4 |
|                         | Midwest                                   | 1,786,834     | 21.1 | 62,495        | 21.0 | 1,724,339        | 21.1 |
|                         | North Atlantic                            | 1,850,516     | 21.9 | 57,662        | 19.4 | 1,792,854        | 22.0 |
|                         | Continental                               | 1,340,866     | 15.9 | 50,453        | 17.0 | 1,290,413        | 15.8 |
|                         | Pacific                                   | 1,431,580     | 16.9 | 47,962        | 16.1 | 1,383,618        | 17.0 |
| Rural/Urban Status      | Urban                                     | 3,919,717     | 46.4 | 136,450       | 45.9 | 3,783,267        | 46.4 |
|                         | Rural                                     | 4,131,908     | 48.9 | 143,114       | 48.1 | 3,988,794        | 48.9 |
| VA Healthcare User Type | VA Only                                   | 5,647,405     | 66.8 | 79,180        | 26.6 | 5,568,225        | 68.3 |
|                         | VA and Non-VA Users                       | 2,805,507     | 33.2 | 218,193       | 73.4 | 2,587,314        | 31.7 |
| Diagnosis               | Coronary arteriosclerosis                 | 93,380        | 1.1  | 93,380        | 31.4 |                  | N/A  |
|                         | Heart failure                             | 88,769        | 1.1  | 88,769        | 29.9 |                  |      |
|                         | Acute myocardial infarction               | 61,501        | 0.7  | 61,501        | 20.7 |                  |      |
|                         | Stroke                                    | 58,386        | 0.7  | 58,386        | 19.6 |                  |      |
|                         | Atrial fibrillation                       | 45,115        | 0.5  | 45,115        | 15.2 |                  |      |

\* All p values (hospitalized vs. not hospitalized) <0.0001 except rural/urban status (p = 0.3967).

† Unknown race: 20,398 (6.9%) hospitalized; 1,188,907 (14.6%) not hospitalized

Unknown ethnicity: 11,749 (4.0%) hospitalized; 857,851 (10.5%) not hospitalized

Unknown region: 17,734 (6.0%) hospitalized; 379,375 (4.7%) not hospitalized

Unknown rural/urban status: 17,809 (6.0%) hospitalized; 383,478 (4.7%) not hospitalized

<https://doi.org/10.1371/journal.pone.0200327.t001>

## Reference

1. Krishnamurthi N, Francis J, Fihn SD, Meyer CS, Whooley MA (2018) Leading causes of cardiovascular hospitalization in 8.45 million US veterans. PLoS ONE 13(3): e0193996. <https://doi.org/10.1371/journal.pone.0193996> PMID: 29566396
